# Supplementary material for: Epicardial Fat Volume, Cardiac Function, and Incident Heart Failure: The Rotterdam Study
Source: PubMed Central journal article supplement — J Am Heart Assoc. 2022 Dec 24;12(1):e026197. doi: 10.1161/JAHA.122.026197 (PMC9973597; doi:10.1161/jaha.122.026197), 2022-12-24
Supplement: JAH3-12-e026197-s001.pdf [file JAH3-12-e026197-s001.pdf]

## Supplemental material

|                                                                                                                                                                                               |    |
|-----------------------------------------------------------------------------------------------------------------------------------------------------------------------------------------------|----|
| <b>Table S1.</b> Characteristics of the study population at baseline, by sex                                                                                                                  | 2  |
| <b>Table S2.</b> Association of epicardial fat volume with repeated measures of echocardiographic parameters of cardiac function in total population, including the time interaction term     | 4  |
| <b>Table S3.</b> Association of epicardial fat volume with repeated measures of echocardiographic parameters of cardiac function, by sex                                                      | 6  |
| <b>Table S4.</b> Association of epicardial fat volume with repeated measures of echocardiographic parameters of cardiac function, including the time interaction term, by sex                 | 8  |
| <b>Table S5.</b> Association of EFV with incident heart failure, by sex                                                                                                                       | 10 |
| <b>Table S6.</b> Association of epicardial fat volume with repeated measures of echocardiographic parameters of cardiac function in the total population, additionally adjusted for LVM index | 11 |
| <b>Table S7.</b> Association of epicardial fat volume with incident heart failure in the total population, additionally adjusted for LVM index                                                | 12 |

**Table S1. Characteristics of the study population at baseline, by sex**

| Characteristic                                 | Men<br>( <i>n</i> =960) | Women<br>( <i>n</i> =1143) | <i>p</i> -value |
|------------------------------------------------|-------------------------|----------------------------|-----------------|
| Age, y                                         | 68 (6.20)               | 68 (6.44)                  | 0.948           |
| Waist, cm                                      | 98.7 (9.92)             | 89.5 (10.9)                | <0.001          |
| BMI, kg/m <sup>2</sup>                         | 27.4 (3.32)             | 27.9 (4.40)                | 0.004           |
| SBP, mmHg                                      | 146 (19.4)              | 147 (20.3)                 | 0.401           |
| DBP, mmHg                                      | 82.0 (10.8)             | 79.4 (10.6)                | <0.001          |
| Anti-hypertensive medication use, <i>n</i> (%) | 335 (35.5)              | 410 (36.2)                 | 0.778           |
| Smoking, <i>n</i> (%)                          |                         |                            | <0.001          |
| Current                                        | 175 (18.8)              | 154 (13.7)                 |                 |
| Never                                          | 142 (15.2)              | 467 (41.6)                 |                 |
| Former                                         | 616 (66.0)              | 501 (44.7)                 |                 |
| Total cholesterol, mmol/l                      | 5.48 (0.91)             | 5.97 (0.94)                | <0.001          |
| HDL cholesterol, mmol/l                        | 1.32 (0.34)             | 1.57 (0.40)                | <0.001          |
| Lipid lowering medication use, <i>n</i> (%)    | 189 (19.7)              | 254 (22.1)                 | 0.185           |
| Prevalent DM, <i>n</i> (%)                     | 118 (12.3)              | 133 (11.6)                 | 0.672           |
| EFV, ml                                        | 122.2 (39.9)            | 91.7 (28.9)                | <0.001          |
| <b>Echocardiographic parameters</b>            |                         |                            |                 |
| LVEDD, mm                                      | 53.8 (4.48)             | 50.2 (4.27)                | <0.001          |
| LVESD, mm                                      | 32.4 (4.54)             | 29.4 (4.04)                | <0.001          |

|                 |              |              |        |
|-----------------|--------------|--------------|--------|
| LVEF, %         | 64.5 (7.02)  | 66.7 (6.20)  | <0.001 |
| LA diameter, mm | 41.8 (5.18)  | 38.9 (5.00)  | <0.001 |
| E/A ratio       | 0.93 (0.24)  | 0.89 (0.29)  | 0.001  |
| DT, ms          | 215.8 (44.7) | 209.5 (40.7) | <0.001 |

Data are mean (SD) for continuous variables and numbers (percentages) for categorical variables.

BMI; Body Mass Index, SBP; systolic blood pressure, DBP; diastolic blood pressure, HDL; high-density lipoprotein; DM; diabetes mellitus, CHD; coronary heart disease, EFV; epicardial fat volume, LVEDD; left ventricular end diastolic dimension, LVESD; left ventricular end systolic dimension, LVEF; left ventricular ejection fraction, LA diameter; left atrial anteroposterior dimension, E/A ratio; E-wave to A-wave ration, DT; Deceleration time

**Table S 2. Association of epicardial fat volume with repeated measures of echocardiographic parameters of cardiac function in total population, including the time interaction term**

| Echocardiographic parameters |          | Model 1                  |                 | Model 2                |                 |
|------------------------------|----------|--------------------------|-----------------|------------------------|-----------------|
|                              |          | $\beta$ (95% CI)         | <i>p</i> -value | $\beta$ (95% CI)       | <i>p</i> -value |
| LVEDD                        | EFV      | 1.28 (1.08 to 1.49)      | <0.001          | 0.76 (0.53 to 0.99)    | <0.001          |
|                              | EFV:time | -0.004 (-0.03 to 0.02)   | 0.762           | -0.001 (-0.03 to 0.02) | 0.916           |
| LVESD                        | EFV      | 1.10 (0.92 to 1.28)      | <0.001          | 0.73 (0.52 to 0.94)    | <0.001          |
|                              | EFV:time | -0.02 (-0.04 to 0.01)    | 0.132           | -0.02 (-0.04 to 0.003) | 0.088           |
| LVEF                         | EFV      | -0.77 (-1.07 to -0.47)   | <0.001          | -0.59 (-0.92 to -0.25) | 0.001           |
|                              | EFV:time | -0.0001 (-0.04 to 0.04)  | 0.995           | 0.01 (-0.03 to 0.05)   | 0.758           |
| LA diameter                  | EFV      | 1.65 (1.42 to 1.88)      | <0.001          | 0.85 (0.59 to 1.11)    | <0.001          |
|                              | EFV:time | 0.06 (0.03 to 0.09)      | <0.001          | 0.05 (0.03 to 0.08)    | <0.001          |
| E/A ratio                    | EFV      | -0.01 (-0.02 to -0.004)  | 0.006           | -0.003 (-0.02 to 0.01) | 0.558           |
|                              | EFV:time | 0.001 (-0.0001 to 0.002) | 0.053           | 0.001 (0 to 0.002)     | 0.067           |
| DT                           | EFV      | 1.21 (-0.68 to 3.10)     | 0.210           | 0.50 (-1.66 to 2.66)   | 0.650           |
|                              | EFV:time | -0.25 (-0.53 to 0.03)    | 0.081           | -0.13 (-0.41 to 0.15)  | 0.365           |

Results are based on linear mixed effects models. Model 1 is adjusted for age (time-varying), sex and cohort. Model 2 is additionally adjusted baseline values of prevalent diabetes, body mass index, smoking, systolic blood pressure, diastolic blood pressure, use of anti-hypertensive medication, total

and high-density lipoprotein (HDL) cholesterol, use of lipid lowering medication and interaction between EFV and time (EFV:time)

LVEDD; left ventricular end diastolic dimension, LVESD; left ventricular end systolic dimension, LVEF; left ventricular ejection fraction, LA diameter; left atrial anteroposterior dimension, E/A ratio; E-wave to A-wave ratio, DT; Deceleration time

The number of men with available data on outcomes was 2065 for LVEDD, 2037 for LVESD, 2045 for LVEF, 2089 for LA diameter, 2074 for E/A ratio and 2045 for DT

**Table S3. Association of epicardial fat volume with repeated measures of echocardiographic parameters of cardiac function, by sex**

| Echocardiographic parameters | Men                    |                 | Women                   |                 |
|------------------------------|------------------------|-----------------|-------------------------|-----------------|
|                              | $\beta$ (95% CI)       | <i>p</i> -value | $\beta$ (95% CI)        | <i>p</i> -value |
| LVEDD                        | 0.47 (0.16 to 0.77)    | 0.003           | 1.18 (0.85 to 1.51)     | <0.001          |
| LVESD                        | 0.44 (0.16 to 0.73)    | 0.003           | 0.95 (0.68 to 1.22)     | <0.001          |
| LVEF                         | -0.66 (-1.11 to -0.21) | 0.004           | -0.42 (-0.83 to -0.001) | 0.049           |
| LA diameter                  | 0.89 (0.56 to 1.22)    | <0.001          | 1.15 (0.76 to 1.54)     | <0.001          |
| E/A ratio                    | -0.001 (-0.02 to 0.01) | 0.898           | 0.004 (-0.01 to 0.02)   | 0.670           |
| DT                           | -0.96 (-3.69 to 1.77)  | 0.490           | 1.435 (-1.48 to 4.35)   | 0.335           |

Results are based on linear mixed effects models. Models are adjusted for age(time-varying), sex, cohort, and baseline values of prevalent diabetes, body mass index, smoking, systolic blood pressure, diastolic blood pressure, use of anti-hypertensive medication, total and high-density lipoprotein (HDL) cholesterol, use of lipid lowering medication

LVEDD; left ventricular end diastolic dimension, LVESD; left ventricular end systolic dimension, LVEF; left ventricular ejection fraction, LA diameter; left atrial anteroposterior dimension, E/A ratio; E-wave to A-wave ration, DT; Deceleration time

The number of men with available data on outcomes was 939 for LVEDD, 921 for LVESD, 925 for LVEF, 951 for LA diameter, 945 for E/A ratio and 927 for DT

The number of men with available data on outcomes was 1126 for LVEDD, 1116 for LVESD, 1120 for LVEF, 1139 for LA diameter, 1129 for E/A ratio and 1118 for DT

**Table S4. Association of epicardial fat volume with repeated measures of echocardiographic parameters of cardiac function, including the time interaction term by sex**

| Echocardiographic parameters |          | Men                    |                 | Women                   |                 |
|------------------------------|----------|------------------------|-----------------|-------------------------|-----------------|
|                              |          | $\beta$ (95% CI)       | <i>p</i> -value | $\beta$ (95% CI)        | <i>p</i> -value |
| LVEDD                        | EFV      | 0.40 (0.07 to 0.72)    | 0.017           | 1.317 (0.96 to 1.68)    | <0.001          |
|                              | EFV:time | 0.02 (-0.01 to 0.06)   | 0.219           | -0.04 (-0.08 to 0.002)  | 0.061           |
| LVESD                        | EFV      | 0.46 (0.15 to 0.77)    | 0.004           | 1.11 (0.80 to 1.41)     | <0.001          |
|                              | EFV:time | -0.01 (-0.04 to 0.03)  | 0.802           | -0.04 (-0.07 to -0.01)  | 0.025           |
| LVEF                         | EFV      | -0.65 (-1.13 to -0.16) | 0.009           | -0.59 (-1.10 to -0.07)  | 0.027           |
|                              | EFV:time | -0.004 (-0.07 to 0.06) | 0.893           | 0.04 (-0.03 to 0.10)    | 0.281           |
| LA diameter                  | EFV      | 0.71 (0.36 to 1.07)    | <0.001          | 0.89 (0.47 to 1.32)     | <0.001          |
|                              | EFV:time | 0.06 (0.02 to 0.10)    | 0.006           | 0.07 (0.03 to 0.12)     | 0.003           |
| E/A ratio                    | EFV      | -0.01 (-0.02 to 0.01)  | 0.412           | -0.003 (-0.02 to 0.01)  | 0.726           |
|                              | EFV:time | 0.002 (0 to 0.004)     | 0.077           | 0.002 (-0.0001 to 0.01) | 0.055           |
| DT                           | EFV      | 0.15 (-2.93 to 3.22)   | 0.926           | 1.57 (-1.83 to 4.98)    | 0.365           |
|                              | EFV:time | -0.32 (-0.73 to 0.09)  | 0.125           | -0.04 (-0.50 to 0.43)   | 0.878           |

Results are based on linear mixed effects models. Models are adjusted for age (time-varying), sex, cohort, and baseline values of prevalent diabetes, body mass index, smoking, systolic blood pressure, diastolic blood pressure, use of anti-hypertensive medication, total and high-density



lipoprotein (HDL) cholesterol, use of lipid lowering medication and interaction between EFV and time (EFV:time)

LVEDD; left ventricular end diastolic dimension, LVESD; left ventricular end systolic dimension, LVEF; left ventricular ejection fraction, LA diameter; left atrial anteroposterior dimension, E/A ratio; E-wave to A-wave ration, DT; Deceleration time

The number of men with available data on outcomes was 939 for LVEDD, 921 for LVESD, 925 for LVEF, 951 for LA diameter, 945 for E/A ratio and 927 for DT

The number of men with available data on outcomes was 1126 for LVEDD, 1116 for LVESD, 1120 for LVEF, 1139 for LA diameter, 1129 for E/A ratio and 1118 for DT

**Table S5. Association of EFV with incident heart failure, by sex**

|                      | Men                 |                 | Women               |                 |
|----------------------|---------------------|-----------------|---------------------|-----------------|
|                      | HR (95% CI)*        | <i>p</i> -value | HR (95% CI)*        | <i>p</i> -value |
| Model 1              | 1.39 (1.11 to 1.76) | 0.010           | 1.38 (1.03 to 1.84) | 0.030           |
| Model 2              | 1.30 (0.97 to 1.76) | 0.080           | 1.36 (0.96 to 1.93) | 0.088           |
| Model 3 <sup>†</sup> | 1.34 (1.00 to 1.82) | 0.053           | 1.27 (0.80 to 2.02) | 0.312           |
| Model 4 <sup>‡</sup> | 1.30 (0.97 to 1.74) | 0.079           | 1.36 (0.85 to 2.17) | 0.204           |

Model 1 is adjusted for age, sex and cohort. Model 2 is additionally adjusted for prevalent diabetes, body mass index, smoking, systolic blood pressure, diastolic blood pressure, use of anti-hypertensive medication, total and high-density lipoprotein (HDL) cholesterol, use of lipid lowering medication. Model 3 is model 2 + additionally adjusted for CHD as a time varying covariate. Model 4 is model 2 + additionally adjusted for AF as a time varying covariate. EFV; epicardial fat volume AF; atrial fibrillation, CHD; coronary heart disease

\*HR: Hazard ratio 95% CI: 95 % confidence interval

**Table S6. Association of epicardial fat volume with repeated measures of echocardiographic parameters of cardiac function in the total population, additionally adjusted for LVM index**

| <b>Echocardiographic parameters</b> | <b><math>\beta</math> (95% CI)</b> | <b><i>p</i>-value</b> |
|-------------------------------------|------------------------------------|-----------------------|
| <b>LVEDD</b>                        | 0.50 (0.32 to 0.67)                | <0.001                |
| <b>LVESD</b>                        | 0.47 (0.30 to 0.64)                | <0.001                |
| <b>LVEF</b>                         | -0.45 (-0.74 to -0.16)             | 0.003                 |
| <b>LA diameter</b>                  | 0.99 (0.75 to 1.23)                | <0.001                |
| <b>E/A ratio</b>                    | 0.001 (-0.01 to 0.01)              | 0.972                 |
| <b>DT</b>                           | 0.44 (-1.69 to 2.57)               | 0.686                 |

Results are based on linear mixed effects models. Models are adjusted for age (time-varying), sex, cohort, and baseline values of prevalent diabetes, body mass index, smoking, systolic blood pressure, diastolic blood pressure, use of anti-hypertensive medication, total and high-density lipoprotein (HDL) cholesterol, use of lipid lowering medication and LVM

LVEDD; left ventricular end diastolic dimension, LVESD; left ventricular end systolic dimension, LVEF; left ventricular ejection fraction, LA diameter; left atrial anteroposterior dimension, E/A ratio; E-wave to A-wave ration, DT; Deceleration time; LVM: Left ventricular mass index by body surface area

**Table S7. Association of epicardial fat volume with incident heart failure in the total population, additionally adjusted for LVM index**

|                                          | <b>HR (95% CI)*</b> | <b>p-value</b> |
|------------------------------------------|---------------------|----------------|
| <b>Model 2 + LVM index</b>               | 1.29 (1.01 to 1.65) | 0.043          |
| <b>Model 2 + LA diameter</b>             | 1.28 (0.99 to 1.64) | 0.056          |
| <b>Model 2 + LA diameter + LVM index</b> | 1.27 (0.99 to 1.62) | 0.053          |

Model 2 is adjusted for age, sex, cohort, prevalent diabetes, body mass index, smoking, systolic blood pressure, diastolic blood pressure, use of anti-hypertensive medication, total and high-density lipoprotein (HDL) cholesterol, use of lipid lowering medication. LA diameter: left atrial diameter; LVM: Left ventricular mass index by body surface area

\*HR: Hazard ratio 95% CI: 95 % confidence interval
